# Supplementary material for: Dietary Inclusion of Dried Chicory Root Affects Cecal Mucosa Proteome of Nursery Pigs
Source: MDPI journal article supplement (doi:10.3390/ani12131710), 2022-07-01
Supplement: s1 [file s1]

**Supplementary Table S1.** List of identified proteins found in the cecum of pigs annotated with the STRING database (<https://string-db.org>) according to their biological process. For each biological process included, the corresponding Gene Ontology (GO) biological process ID and its description, the number of gene count and its identity as well as the level of significance are reported. Full name of identified proteins along with the corresponding genes can be found in Table 1.

| Biological process ID | Biological process description                         | Gene count | P-value               | Matching proteins in the network                                                                                  |
|-----------------------|--------------------------------------------------------|------------|-----------------------|-------------------------------------------------------------------------------------------------------------------|
| GO:0009987            | cellular process                                       | 18         | $6.55 \times 10^{-9}$ | TUBA1B, TPI1, HSPCA, CKMT1, VCP, ALDH9A1, DST, HSP27, TF, MSN, EEF1G, C3, CALR, KRT20, HSP70.2, GNB2L1, MX1, CFL1 |
| GO:0065007            | biological regulation                                  | 15         | $1.06 \times 10^{-7}$ | SERPINB1, PSME2, HSPCA, ANXA2, LMNA, DSTN, HSP27, TF, C3, CALR, KRT20, HSP70.2, GNB2L1, MX1, CFL1                 |
| GO:0006457            | protein folding                                        | 4          | $1.13 \times 10^{-5}$ | HSPCA, HSP27, CALR, HSP70.2                                                                                       |
| GO:0007010            | cytoskeleton organization                              | 5          | $5.27 \times 10^{-5}$ | TUBA1B, DSTN, CALR, KRT20, CFL1                                                                                   |
| GO:0016043            | cellular component organization                        | 7          | 0.00012               | TUBA1B, VCP, DSTN, CALR, KRT20, MX1, CFL1                                                                         |
| GO:0050790            | regulation of catalytic activity                       | 6          | 0.00023               | SERPINB1, PSME2, HSPCA, ANXA2, C3, GNB2L1                                                                         |
| GO:0052548            | regulation of endopeptidase activity                   | 4          | 0.00040               | SERPINB1, PSME2, C3, GNB2L1                                                                                       |
| GO:0051171            | regulation of nitrogen compound metabolic process      | 7          | 0.00043               | SERPINB1, PSME2, HSPCA, HSP27, C3, CALR, GNB2L1                                                                   |
| GO:0051049            | regulation of transport                                | 5          | 0.00050               | C3, CALR, KRT20, GNB2L1, MX1                                                                                      |
| GO:0031323            | regulation of cellular metabolic process               | 7          | 0.00053               | SERPINB1, PSME2, HSPCA, HSP27, C3, CALR, GNB2L1                                                                   |
| GO:0046907            | intracellular transport                                | 4          | 0.00053               | VCP, HSP27, CALR, MX1                                                                                             |
| GO:0051130            | positive regulation of cellular component organization | 4          | 0.00053               | DSTN, CALR, HSP70.2, GNB2L1                                                                                       |
| GO:0051128            | regulation of cellular component organization          | 5          | 0.00063               | DSTN, CALR, HSP70.2, GNB2L1, CFL1                                                                                 |
| GO:0006950            | response to stress                                     | 6          | 0.00072               | HSPCA, VCP, C3, CALR, KRT20, MX1                                                                                  |
| GO:0043086            | negative regulation of catalytic activity              | 4          | 0.00086               | SERPINB1, ANXA2, C3, GNB2L1                                                                                       |
| GO:0051726            | regulation of cell cycle                               | 4          | 0.00086               | PSME2, CALR, HSP70.2, GNB2L1                                                                                      |
| GO:1901566            | organonitrogen compound biosynthetic process           | 5          | 0.00086               | TPI1, VCP, ALDH9A1, EEF1G, GNB2L1                                                                                 |

|            |                                                           |   |        |                                                      |
|------------|-----------------------------------------------------------|---|--------|------------------------------------------------------|
| GO:0032269 | negative regulation of cellular protein metabolic process | 4 | 0.0012 | SERPINB1, C3, CALR, GNB2L1                           |
| GO:0097435 | supramolecular fiber organization                         | 3 | 0.0015 | DSTN, KRT20, CFL1                                    |
| GO:0065008 | regulation of biological quality                          | 6 | 0.0016 | HSPCA, DSTN, TF, C3, CALR, GNB2L1                    |
| GO:0006414 | translational elongation                                  | 2 | 0.0018 | EEF1G, GNB2L1                                        |
| GO:0030036 | actin cytoskeleton organization                           | 3 | 0.0018 | DSTN, CALR, CFL1                                     |
| GO:0030042 | actin filament depolymerization                           | 2 | 0.0018 | DSTN, CFL1                                           |
| GO:0048519 | negative regulation of biological process                 | 6 | 0.0018 | SERPINB1, LMNA, C3, CALR, GNB2L1, MX1                |
| GO:0044271 | cellular nitrogen compound biosynthetic process           | 5 | 0.0022 | TPI1, VCP, ALDH9A1, EEF1G, GNB2L1                    |
| GO:0009893 | positive regulation of metabolic process                  | 5 | 0.0023 | PSME2 ,HSPCA, C3, CALR, GNB2L1                       |
| GO:0016197 | endosomal transport                                       | 2 | 0.0036 | VCP, MX1                                             |
| GO:0008152 | metabolic process                                         | 8 | 0.0038 | TPI1, CKMT1, VCP, ALDH9A1, EEF1G, C3, AKR1A1, GNB2L1 |
| GO:0010564 | regulation of cell cycle process                          | 3 | 0.0038 | PSME2, CALR, HSP70.2                                 |
| GO:0022603 | regulation of anatomical structure morphogenesis          | 3 | 0.0046 | CALR, GNB2L1, CFL1                                   |
| GO:0034613 | cellular protein localization                             | 3 | 0.0050 | LMNA, HSP27, CALR                                    |
| GO:0050896 | response to stimulus                                      | 7 | 0.0050 | HSPCA, VCP, C3, CALR, KRT20, GNB2L1, MX1             |
| GO:0006810 | transport                                                 | 5 | 0.0051 | VCP, HSP27, TF, CALR, MX1                            |
| GO:1901564 | organonitrogen compound metabolic process                 | 6 | 0.0052 | TPI1, VCP, ALDH9A1 ,EEF1G, C3, GNB2L1                |
| GO:0033043 | regulation of organelle organization                      | 3 | 0.0057 | DSTN, CALR, HSP70.2                                  |
| GO:0044237 | cellular metabolic process                                | 7 | 0.0058 | TPI1, CKMT1, VCP, ALDH9A1, EEF1G, C3, GNB2L1         |
| GO:0043900 | regulation of multi-organism process                      | 3 | 0.0059 | ANXA2, CALR, MX1                                     |
| GO:0050764 | regulation of phagocytosis                                | 2 | 0.0059 | CALR, GNB2L1                                         |
| GO:0050793 | regulation of developmental process                       | 4 | 0.0059 | LMNA, CALR, GNB2L1, CFL1                             |
| GO:0051050 | positive regulation of transport                          | 3 | 0.0059 | C3, CALR, GNB2L1                                     |
| GO:0051495 | positive regulation of cytoskeleton organization          | 2 | 0.0059 | DSTN, HSP70.2                                        |

|            |                                                            |   |        |                          |
|------------|------------------------------------------------------------|---|--------|--------------------------|
| GO:0016567 | protein ubiquitination                                     | 2 | 0.0062 | VCP, GNB2L1              |
| GO:1902905 | positive regulation of supramolecular fiber organization   | 2 | 0.0062 | DSTN, HSP70.2            |
| GO:0051783 | regulation of nuclear division                             | 2 | 0.0069 | CALR, HSP70.2            |
| GO:0061136 | regulation of proteasomal protein catabolic process        | 2 | 0.0069 | PSME2, GNB2L1            |
| GO:0002376 | immune system process                                      | 4 | 0.0075 | MSN, C3, CALR, MX1       |
| GO:0033554 | cellular response to stress                                | 3 | 0.0078 | VCP, CALR, KRT20         |
| GO:0034504 | protein localization to nucleus                            | 2 | 0.0082 | LMNA, CALR               |
| GO:0010950 | positive regulation of endopeptidase activity              | 2 | 0.0090 | PSME2, GNB2L1            |
| GO:0051173 | positive regulation of nitrogen compound metabolic process | 4 | 0.0091 | PSME2, HSPCA, C3, GNB2L1 |
| GO:0030100 | regulation of endocytosis                                  | 2 | 0.0093 | CALR, GNB2L1             |
| GO:0051094 | positive regulation of developmental process               | 3 | 0.0093 | LMNA, CALR, GNB2L1       |
| GO:0010604 | positive regulation of macromolecule metabolic process     | 4 | 0.0094 | PSME2, C3, CALR, GNB2L1  |
| GO:0031334 | positive regulation of protein complex assembly            | 2 | 0.0100 | HSP70.2, GNB2L1          |
| GO:0048585 | negative regulation of response to stimulus                | 3 | 0.0100 | LMNA, CALR, GNB2L1       |
| GO:0006417 | regulation of translation                                  | 2 | 0.0107 | CALR, GNB2L1             |
| GO:0031325 | positive regulation of cellular metabolic process          | 4 | 0.0107 | PSME2, HSPCA, C3, GNB2L1 |
| GO:0006575 | cellular modified amino acid metabolic process             | 2 | 0.0115 | ALDH9A1, EEF1G           |
| GO:0031326 | regulation of cellular biosynthetic process                | 4 | 0.0116 | HSPCA, C3, CALR, GNB2L1  |
| GO:0001932 | regulation of protein phosphorylation                      | 3 | 0.0130 | HSP27, C3, GNB2L1        |
| GO:0043901 | negative regulation of multi-organism process              | 2 | 0.0130 | CALR, MX1                |
| GO:0022604 | regulation of cell morphogenesis                           | 2 | 0.0136 | CALR, CFL1               |
| GO:0009967 | positive regulation of signal transduction                 | 3 | 0.0150 | C3, CALR, GNB2L1         |

|            |                                                           |   |        |                               |
|------------|-----------------------------------------------------------|---|--------|-------------------------------|
| GO:0032270 | positive regulation of cellular protein metabolic process | 3 | 0.0172 | PSME2, C3, GNB2L1             |
| GO:0007346 | regulation of mitotic cell cycle                          | 2 | 0.0205 | PSME2, HSP70.2                |
| GO:0010951 | negative regulation of endopeptidase activity             | 2 | 0.0205 | SERPINB1, C3                  |
| GO:0051716 | cellular response to stimulus                             | 5 | 0.0206 | VCP, CALR, KRT20, GNB2L1, MX1 |
| GO:0051223 | regulation of protein transport                           | 2 | 0.0220 | KRT20, GNB2L1                 |
| GO:0030335 | positive regulation of cell migration                     | 2 | 0.0228 | CALR, GNB2L1                  |
| GO:0034622 | cellular protein-containing complex assembly              | 2 | 0.0237 | CALR, MX1                     |
| GO:0051051 | negative regulation of transport                          | 2 | 0.0237 | GNB2L1, MX1                   |
| GO:0019538 | protein metabolic process                                 | 4 | 0.0274 | VCP, EEF1G, C3, GNB2L1        |
| GO:0042221 | response to chemical                                      | 4 | 0.0282 | HSPCA, VCP, GNB2L1, MX1       |
| GO:0048583 | regulation of response to stimulus                        | 4 | 0.0290 | LMNA, C3, CALR, GNB2L1        |
| GO:0051186 | cofactor metabolic process                                | 2 | 0.0319 | TPI1, EEF1G                   |
| GO:0002252 | immune effector process                                   | 2 | 0.0327 | C3, MX1                       |
| GO:0032787 | monocarboxylic acid metabolic process                     | 2 | 0.0377 | TPI1, C3                      |
| GO:0009968 | negative regulation of signal transduction                | 2 | 0.0430 | CALR, GNB2L1                  |
| GO:0034645 | cellular macromolecule biosynthetic process               | 3 | 0.0437 | VCP,EEF1G, GNB2L1             |
| GO:1901137 | carbohydrate derivative biosynthetic process              | 2 | 0.0440 | TPI1, VCP                     |
| GO:0050801 | ion homeostasis                                           | 2 | 0.0447 | TF, GNB2L1                    |
| GO:0055082 | cellular chemical homeostasis                             | 2 | 0.0447 | TF, GNB2L1                    |
| GO:0009605 | response to external stimulus                             | 3 | 0.0471 | C3, KRT20, MX1                |

**Supplementary Table S2.** List of identified proteins found in the cecum of pigs annotated with the STRING database (<https://string-db.org>) according to their molecular function. For each molecular function included, the corresponding Gene Ontology (GO) molecular function ID and its description, the number of gene count and its identity as well as the level of significance are reported. Full name of identified proteins along with the corresponding genes can be found in Table 1.

| Molecular function ID | Molecular function description         | Gene count | P-value               | Matching proteins in the network                                                                           |
|-----------------------|----------------------------------------|------------|-----------------------|------------------------------------------------------------------------------------------------------------|
| GO:0005488            | binding                                | 17         | $2.79 \times 10^{-9}$ | TUBA1B, HSPCA, ANXA2, CKMT1, VCP, DSTN, HSP27, ANXA4, TF, MSN, EEF1G, C3, CALR, HSP70.2, GNB2L1, MX1, CFL1 |
| GO:0005515            | protein binding                        | 10         | $4.52 \times 10^{-6}$ | HSPCA, ANXA2, DSTN, HSP27, MSN, C3, CALR, GNB2L1, MX1, CFL1                                                |
| GO:0030234            | enzyme regulator activity              | 6          | $6.04 \times 10^{-6}$ | SERPINB1, PSME2, HSPCA, ANXA2, C3, GNB2L1                                                                  |
| GO:0043167            | ion binding                            | 10         | $6.04 \times 10^{-6}$ | TUBA1B, HSPCA, ANXA2, CKMT1, VCP, ANXA4, TF, CALR, HSP70.2, MX1                                            |
| GO:0008092            | cytoskeletal protein binding           | 5          | $1.20 \times 10^{-5}$ | ANXA2, DSTN, MSN, MX1, CFL1                                                                                |
| GO:0032555            | purine ribonucleotide binding          | 6          | $2.80 \times 10^{-5}$ | TUBA1B, HSPCA, CKMT1, VCP, HSP70.2, MX1                                                                    |
| GO:0003824            | catalytic activity                     | 9          | $3.14 \times 10^{-5}$ | TUBA1B, TPI1, HSPCA, CKMT1, VCP, ALDH9A1, EEF1G, AKR1A1, MX1                                               |
| GO:1901363            | heterocyclic compound binding          | 8          | $3.30 \times 10^{-5}$ | TUBA1B, HSPCA, CKMT1, VCP, EEF1G, CALR, HSP70.2, MX1                                                       |
| GO:0061134            | peptidase regulator activity           | 4          | $4.14 \times 10^{-5}$ | SERPINB1, PSME2, C3, GNB2L1                                                                                |
| GO:0097159            | organic cyclic compound binding        | 8          | $4.14 \times 10^{-5}$ | TUBA1B, HSPCA, CKMT1, VCP, EEF1G, CALR, HSP70.2, MX1                                                       |
| GO:0004857            | enzyme inhibitor activity              | 4          | 0.00013               | SERPINB1, ANXA2, C3, GNB2L1                                                                                |
| GO:0017111            | nucleoside-triphosphatase activity     | 4          | 0.00015               | TUBA1B, HSPCA, VCP, MX1                                                                                    |
| GO:0005544            | calcium-dependent phospholipid binding | 2          | 0.00039               | ANXA2, ANXA4                                                                                               |
| GO:0061135            | endopeptidase regulator activity       | 3          | 0.00061               | SERPINB1, PSME2, C3                                                                                        |
| GO:0003779            | actin binding                          | 3          | 0.00075               | DSTN, MSN, CFL1                                                                                            |
| GO:0005524            | ATP binding                            | 4          | 0.00075               | HSPCA, CKMT1, VCP, HSP70.2                                                                                 |
| GO:0051082            | unfolded protein binding               | 2          | 0.00087               | HSPCA, CALR                                                                                                |
| GO:0008144            | drug binding                           | 4          | 0.0016                | HSPCA, CKMT1, VCP, HSP70.2                                                                                 |
| GO:0008289            | lipid binding                          | 3          | 0.0016                | ANXA2, VCP, ANXA4                                                                                          |
| GO:0044877            | protein-containing complex binding     | 3          | 0.0022                | CALR, GNB2L1, CFL1                                                                                         |

|            |                                   |   |        |                        |
|------------|-----------------------------------|---|--------|------------------------|
| GO:0005509 | calcium ion binding               | 3 | 0.0023 | ANXA2, ANXA4, CALR     |
| GO:0005198 | structural molecule activity      | 3 | 0.0045 | TUBA1B, LMNA, KRT20    |
| GO:0019904 | protein domain specific binding   | 2 | 0.0056 | HSPCA, GNB2L1          |
| GO:0003924 | GTPase activity                   | 2 | 0.0068 | TUBA1B, MX1            |
| GO:0016887 | ATPase activity                   | 2 | 0.0094 | HSPCA, VCP             |
| GO:0004866 | endopeptidase inhibitor activity  | 2 | 0.0104 | SERPINB1, C3           |
| GO:0005525 | GTP binding                       | 2 | 0.0115 | TUBA1B, MX1            |
| GO:0046872 | metal ion binding                 | 4 | 0.0179 | ANXA2, ANXA4, TF, CALR |
| GO:0042803 | protein homodimerization activity | 2 | 0.0180 | HSP27, GNB2L1          |
| GO:0005102 | signaling receptor binding        | 3 | 0.0278 | C3, CALR, GNB2L1       |
| GO:0003723 | RNA binding                       | 2 | 0.0310 | EEF1G, CALR            |
| GO:0019899 | enzyme binding                    | 2 | 0.0457 | CALR, GNB2L1           |

**Supplementary Table S3.** List of identified proteins found in the cecum of pigs annotated with the STRING database (<https://string-db.org>) according to their cellular localization. For each cellular component included, the corresponding Gene Ontology (GO) cellular component ID and its description, the number of gene count and its identity as well as the level of significance are reported. Full name of identified proteins along with the corresponding genes can be found in Table 1.

| Cellular component ID | Cellular component description               | Gene count | P-value                | Matching proteins in the network                                                                                                         |
|-----------------------|----------------------------------------------|------------|------------------------|------------------------------------------------------------------------------------------------------------------------------------------|
| GO:0005622            | intracellular                                | 20         | $1.72 \times 10^{-12}$ | TUBA1B, TPI1, SERPINB1, PSME2, HSPCA, ANXA2, CKMT1, VCP, ALDH9A1, LMNA, DSTN, HSP27, MSN, EEF1G, CALR, KRT20, HSP70.2, GNB2L1, MX1, CFL1 |
| GO:0005737            | cytoplasm                                    | 18         | $8.45 \times 10^{-12}$ | TUBA1B, TPI1, SERPINB1, PSME2, HSPCA, ANXA2, CKMT1, VCP, ALDH9A1, DSTN, HSP27, MSN, EEF1G, CALR, HSP70.2, GNB2L1, MX1, CFL1              |
| GO:0043229            | intracellular organelle                      | 16         | $2.59 \times 10^{-10}$ | TUBA1B, HSPCA, ANXA2, CKMT1, VCP, LMNA, DSTN, HSP27, MSN, EEF1G, CALR, KRT20, HSP70.2, GNB2L1, MX1, CFL1                                 |
| GO:0005856            | cytoskeleton                                 | 8          | $3.71 \times 10^{-9}$  | TUBA1B, LMNA, DSTN, HSP27, MSN, KRT20, HSP70.2, CFL1                                                                                     |
| GO:0043232            | intracellular non-membrane-bounded organelle | 10         | $3.71 \times 10^{-9}$  | TUBA1B, VCP, LMNA, DSTN, HSP27, MSN, KRT20, HSP70.2, GNB2L1, CFL1                                                                        |
| GO:0005634            | nucleus                                      | 8          | $5.35 \times 10^{-6}$  | HSPCA, VCP, LMNA, HSP27, EEF1G, CALR, GNB2L1, CFL1                                                                                       |
| GO:0043227            | membrane-bounded organelle                   | 11         | $5.35 \times 10^{-6}$  | HSPCA, ANXA2, CKMT1, VCP, LMNA, HSP27, EEF1G, CALR, GNB2L1, MX1, CFL1                                                                    |
| GO:0099513            | polymeric cytoskeletal fiber                 | 3          | 0.00075                | TUBA1B, LMNA, KRT20                                                                                                                      |
| GO:0005882            | intermediate filament                        | 2          | 0.0010                 | LMNA, KRT20                                                                                                                              |
| GO:0015630            | microtubule cytoskeleton                     | 3          | 0.0010                 | TUBA1B, HSP27, HSP70.2                                                                                                                   |
| GO:0031967            | organelle envelope                           | 4          | 0.0010                 | CKMT1, LMNA, CALR, MX1                                                                                                                   |
| GO:0071944            | cell periphery                               | 6          | 0.0010                 | HSPCA, DSTN, MSN, CALR, GNB2L1, CFL1                                                                                                     |
| GO:0016020            | membrane                                     | 7          | 0.0021                 | HSPCA, CKMT1, MSN, CALR, GNB2L1, MX1, CFL1                                                                                               |
| GO:0070013            | intracellular organelle lumen                | 4          | 0.0021                 | LMNA, CALR, GNB2L1, CFL1                                                                                                                 |
| GO:0031253            | cell projection membrane                     | 2          | 0.0031                 | MSN, CFL1                                                                                                                                |

|            |                           |   |        |                                |
|------------|---------------------------|---|--------|--------------------------------|
| GO:0005829 | cytosol                   | 4 | 0.0039 | TPI1, VCP, CALR, GNB2L1        |
| GO:0005886 | plasma membrane           | 5 | 0.0040 | HSPCA, MSN, CALR, GNB2L1, CFL1 |
| GO:0042470 | melanosome                | 2 | 0.0056 | HSPCA, ANXA2                   |
| GO:0005635 | nuclear envelope          | 2 | 0.0057 | LMNA, CALR                     |
| GO:0031981 | nuclear lumen             | 3 | 0.0063 | LMNA, GNB2L1, CFL1             |
| GO:0005576 | extracellular region      | 5 | 0.0067 | SERPINB1, ANXA2, TF, C3, CALR  |
| GO:0015629 | actin cytoskeleton        | 2 | 0.0105 | DSTN, CFL1                     |
| GO:0012505 | endomembrane system       | 4 | 0.0126 | VCP, LMNA, CALR, MX1           |
| GO:0005783 | endoplasmic reticulum     | 3 | 0.0130 | VCP, CALR, MX1                 |
| GO:0005739 | mitochondrion             | 3 | 0.0183 | CKMT1, GNB2L1, MX1             |
| GO:0005654 | nucleoplasm               | 2 | 0.0302 | LMNA, GNB2L1                   |
| GO:1990904 | ribonucleoprotein complex | 2 | 0.0412 | CALR, GNB2L1                   |
| GO:0031966 | mitochondrial membrane    | 2 | 0.0424 | CKMT1, MX1                     |



**Supplementary Table S4.** List of significant KEGG Pathways associated with proteins found in the cecum of pigs. For each pathway included, the corresponding ID and its description, the number of gene count and its identity as well as the level of significance are reported. Full name of identified proteins along with the corresponding genes can be found in Table 1.

| KEGG Pathway ID | KEGG Pathway description                    | Gene count | P-value | Matching proteins in the network                                  |
|-----------------|---------------------------------------------|------------|---------|-------------------------------------------------------------------|
| ssc00010        | Glycolysis / Gluconeogenesis                | 4          | 0.0013  | TPI1, ALDH9A1, PGAM1, AKR1A1                                      |
| ssc04141        | Protein processing in endoplasmic reticulum | 5          | 0.0016  | HSPCA, VCP, ERP29, CALR, HSP70.2                                  |
| ssc01200        | Carbon metabolism                           | 4          | 0.0042  | TPI1, PGAM1, G6PD, IDH1                                           |
| ssc01100        | Metabolic pathways                          | 10         | 0.0060  | TST, TPI1, CKMT1, ALDH9A1, GFPT1, PGAM1, G6PD, AKR1A1, IDH1, UGDH |
| ssc04530        | Tight junction                              | 4          | 0.0066  | TUBA1B, MYL12B, MSN, ACTR3                                        |
| ssc05230        | Central carbon metabolism in cancer         | 3          | 0.0066  | MAPK1, PGAM1, G6PD                                                |
| ssc01230        | Biosynthesis of amino acids                 | 3          | 0.0071  | TPI1, PGAM1, IDH1                                                 |
| ssc00053        | Ascorbate and aldarate metabolism           | 2          | 0.0090  | ALDH9A1, UGDH                                                     |
| ssc00040        | Pentose and glucuronate interconversions    | 2          | 0.0111  | AKR1A1, UGDH                                                      |
| ssc04810        | Regulation of actin cytoskeleton            | 4          | 0.0111  | MYL12B, MAPK1, MSN, CFL1                                          |
| ssc04145        | Phagosome                                   | 3          | 0.0333  | TUBA1B, C3, CALR                                                  |
| ssc04210        | Apoptosis                                   | 3          | 0.0333  | TUBA1B, LMNA, MAPK1                                               |
| ssc00330        | Arginine and proline metabolism             | 2          | 0.0407  | CKMT1, ALDH9A1                                                    |
| ssc00480        | Glutathione metabolism                      | 2          | 0.0407  | G6PD, IDH1                                                        |
| ssc00520        | Amino sugar and nucleotide sugar metabolism | 2          | 0.0424  | GFPT1, UGDH                                                       |

**Supplementary Table S5.** List of significant local network clusters (STRING) associated with proteins found in the cecum of pigs. For each cluster included, the corresponding ID and its description, the number of gene count and its identity as well as the level of significance are reported. Full name of identified proteins along with the corresponding genes can be found in Table 1.

| Network cluster ID | Network cluster description                                                                                                | Gene count | P-value               | Matching proteins in the network               |
|--------------------|----------------------------------------------------------------------------------------------------------------------------|------------|-----------------------|------------------------------------------------|
| CL:23712           | mixed, incl. Carbon metabolism, and Amino sugar and nucleotide sugar metabolism                                            | 8          | $2.54 \times 10^{-6}$ | CS, TPI1, GFPT1, PGAM1, G6PD, IDH1, UGDH, ENO1 |
| CL:23718           | Carbon metabolism, and lactate/malate dehydrogenase, NAD binding domain                                                    | 6          | $6.96 \times 10^{-6}$ | CS, TPI1, PGAM1, G6PD, IDH1, ENO1              |
| CL:23803           | Pentose phosphate pathway, and Glycolysis                                                                                  | 4          | 0.00010               | TPI1, PGAM1, G6PD, ENO1                        |
| CL:23809           | Glycolysis, and Enolase, N-terminal domain                                                                                 | 3          | 0.00022               | TPI1, PGAM1, ENO1                              |
| CL:19479           | TCP-1/cpn60 chaperonin family, and translation elongation factor activity                                                  | 3          | 0.00042               | CCT7, EEF1G, CCT5                              |
| CL:24310           | mixed, incl. glyceraldehyde-3-phosphate dehydrogenase (NAD+) (non-phosphorylating) activity, and Acyl-CoA reductase (LuxC) | 2          | 0.0037                | ALDH9A1, AKR1A1                                |
| CL:19481           | Chaperonin TCP-1, conserved site                                                                                           | 2          | 0.0081                | CCT7, CCT5                                     |
| CL:18094           | DnaJ C terminal domain, and Stress response                                                                                | 2          | 0.0111                | HSPCA, HSP70.2                                 |
| CL:18082           | mixed, incl. Protein processing in endoplasmic reticulum, and DnaJ domain                                                  | 4          | 0.0122                | HSPCA, ERP29, CALR, HSP70.2                    |
| CL:33012           | Intermediate filament protein                                                                                              | 2          | 0.0142                | KRT20, KRT77                                   |
| CL:4830            | mixed, incl. RHO GTPases Activate WASPs and WAVES, and Cofilin/tropomyosin-type actin-binding protein                      | 3          | 0.0142                | DSTN, ACTR3, CFL1                              |
| CL:23721           | Tricarboxylic acid cycle, and Citrate synthase, C-terminal domain                                                          | 2          | 0.0212                | CS, IDH1                                       |
| CL:18326           | mixed, incl. Calnexin/calreticulin cycle, and ERO1-like superfamily                                                        | 2          | 0.0259                | ERP29, CALR                                    |
| CL:21078           | mRNA Splicing - Major Pathway                                                                                              | 3          | 0.0323                | PRPF19, PCBP1, HNRNPK                          |
| CL:23942           | Amino sugar and nucleotide sugar metabolism, and Glucose-6-phosphatase                                                     | 2          | 0.0358                | GFPT1, UGDH                                    |
| CL:4833            | RHO GTPases Activate WASPs and WAVES, and Profilin                                                                         | 2          | 0.0358                | ACTR3, CFL1                                    |
| CL:24104           | mixed, incl. Metabolism of amino acids and derivatives, and beta-Alanine metabolism                                        | 3          | 0.0413                | TST, ALDH9A1, AKR1A1                           |
